# Supplementary material for: Co-catalysis of propane dehydrogenation by Al 2 O 3 -supported Ni nanoparticles and VO x
Source: Royal Society of Chemistry journal article supplement (doi:10.1039/d4cy01216j), 2024-12-11
Supplement: d4cy01216j1.pdf [file d4cy01216j1.pdf]

## Supporting Information

### Co-catalysis of Al<sub>2</sub>O<sub>3</sub>-supported Ni nanoparticles and VO<sub>x</sub> in propane dehydrogenation

Guomin Li <sup>a,b, c</sup>, Bin Wang <sup>a</sup>, Xingchao Dai <sup>a</sup>, Feng Shi <sup>a</sup>, Yong Ding <sup>b</sup>, Xinjiang Cui <sup>a\*</sup>

<sup>a</sup> State Key Laboratory of Low Carbon Catalysis and Carbon Dioxide Utilization, State Key Laboratory for Oxo Synthesis and Selective Oxidation, Lanzhou Institute of Chemical Physics, Chinese Academy of Sciences, No.18, Tianshui Middle Road, Lanzhou 730000, China.

<sup>b</sup> Key Laboratory of Advanced Catalysis of Gansu Province, College of Chemistry and Chemical Engineering, Lanzhou University, No. 222 South Tianshui Road, 730000, Lanzhou, China.

<sup>c</sup> University of Chinese Academy of Sciences, No. 19 A, Yuquanlu, Beijing, 100049, China.

\* Corresponding author: [xinjiangcui@licp.cas.cn](mailto:xinjiangcui@licp.cas.cn) (Prof. Dr. Xinjiang Cui)

## **Experimental**

### **Catalyst preparation**

The catalyst was prepared by the gel method. The preparation of  $\text{NiV}_2\text{O}_x/\text{Al}_2\text{O}_3$  was exemplified: 5.50 g of ammonium carbonate was dissolved in 35 ml of water to obtain an ammonium carbonate solution. 0.50 g of  $\text{Ni}(\text{NO}_3)_2 \cdot 6\text{H}_2\text{O}$ , 0.56 g of  $\text{VOSO}_4$ , and 14.70 g of  $\text{Al}(\text{NO}_3)_3 \cdot 9\text{H}_2\text{O}$  were dissolved in 20 ml of water in a 150 ml beaker, and then the beaker was transferred to an oil bath at 70 °C and stirred. Add ammonium carbonate solution into it to form gel, and then continue stirring for 2 h. Subsequently, the gel was transferred into a surface dish and dried in a 100 °C oven for 10 h. The dried samples were placed in a muffle furnace and calcined at 500 °C for 3 h under air atmosphere to obtain the catalyst  $\text{NiV}_2\text{O}_x\text{-Al}_2\text{O}_3$ . The  $\text{NiV}_2\text{O}_x\text{-Al}_2\text{O}_3$  was reduced for 2 h at 500 °C in a flow of 2 ml/min  $\text{H}_2$  and 18 ml/min Ar, denoted as  $\text{NiV}_2\text{O}_x\text{-Al}_2\text{O}_3\text{-fresh}$ . After reduction, turned off  $\text{H}_2$  and kept Ar blowing for 30 minutes. Then, introduced 3.6 ml/min of  $\text{C}_3\text{H}_8$ , and the sample reacted for 2 h was recorded as  $\text{NiV}_2\text{O}_x\text{-Al}_2\text{O}_3\text{-act}$ . where "fresh" represents the reduced sample and "act" represents the activated sample. Other catalysts were prepared according to the same procedure, and the raw material samples were weighed as needed.

### **catalyst characterization**

X-ray diffraction (XRD) patterns were collected on a Smartlab-SEX X-ray diffractometer. The contents of various metal elements in the catalysts were measured by inductively coupled plasma-atomic emission spectrometry (ICP-AES). The TEM images were obtained on a Talos F200S microscope instrument. Textual properties of the catalysts were measured with Quantachrome IQ2 by nitrogen adsorption at -196 °C. The samples were outgassed at 300 °C for 3h before measurements. The data was analyzed using the Brunauer-Emmett-Teller (BET) method. X-ray photoelectron spectroscopy (XPS) was obtained by a VG ES-CALAB 210 instrument equipped with a 5 keV Ar ion gun. To obtain a fresh surface state of the active species, the sample were etched with Ar ions for 40 s in a low-energy state of 2000 eV and then

analyzed again by XPS.

H<sub>2</sub> temperature programmed reduction (H<sub>2</sub>-TPR) was conducted on the chemical adsorption analyzer (TP-5080d-tianjin Xianquan industry and Trade Co., Ltd.). The catalyst was pretreated at 400 °C for 1 h with flowing He, and then cooled to room temperature. Subsequently, the sample was flushed by 5% H<sub>2</sub>/N<sub>2</sub> (40 ml/min) until the baseline is stable. The catalyst was reduced from room temperature to 900 °C at the rate of 10 °C/min and maintain for 20 minutes, while recording the reduction curve.

NH<sub>3</sub> temperature-programmed desorption (NH<sub>3</sub>-TPD) was conducted on the chemical adsorption analyzer (TP-5080d-tianjin Xianquan industry and Trade Co., Ltd.). 0.1 g of the corresponding catalyst was pretreated in situ in the reaction tube, and then cooled to room temperature with flowing He. At room temperature, 5% NH<sub>3</sub>/He (15 ml/min) was introduced for 30 min, and then switched back to He (40 ml/min) to purge the sample to a stable baseline. Subsequently, it was heated to 700 °C at a heating rate of 10 °C/min, and the desorption curve was recorded at the same time.

C<sub>3</sub>H<sub>8</sub>/H<sub>2</sub> temperature-programmed desorption (C<sub>3</sub>H<sub>8</sub>/H<sub>2</sub>-TPD) and the temperature programmed surface reaction of propane (C<sub>3</sub>H<sub>8</sub>-TPSR) experiments were performed on a fixed bed reactor equipped with an on-line mass spectrometer (Shanghai Pro-tech Limited Company). 0.5 g of the sample was placed in a fixed bed reactor for in-situ pretreatment as needed, and then lower it to room temperature. C<sub>3</sub>H<sub>8</sub>/H<sub>2</sub>-TPD: C<sub>3</sub>H<sub>8</sub>/H<sub>2</sub> (15 ml/min) was introduced for 30 min, and then switched to Ar (18 ml/min) to purge the sample to a stable baseline. Subsequently, it was heated to 500 °C at a heating rate of 10 °C/min and maintain for 30 minutes, while recording the desorption curve. C<sub>3</sub>H<sub>8</sub>-TPSR: 3.6 ml/min of C<sub>3</sub>H<sub>8</sub> and 18 ml/min of Ar were introduced and the mass spectrometry signal was recorded. When the mass spectrometry signal stabilized, the heating was started at a heating rate of 10 °C/min to 550 °C, and the corresponding m/z signal curve was recorded. The mass spectrometry signals to be detected included H<sub>2</sub> (m/z=2), C<sub>3</sub>H<sub>8</sub> (m/z=29), and C<sub>3</sub>H<sub>6</sub> (m/z=41).

In situ FTIR was collected on the experimental device built in our institute. After in situ reduction of the catalyst in the sample cell, propane (10 ml/min) and N<sub>2</sub> (20 ml/min) were introduced at 500 °C and maintained for 2h. Subsequently, flushed with N<sub>2</sub> for 20 min (20 ml/min). The infrared spectrum was continuously collected from the time when propane was introduced to the time when purging was completed.

### **Catalytic evaluation**

0.5 g of calcined catalyst was placed in a fixed bed reaction tube. The catalyst was reduced in situ at 500 °C in a stream of 2 ml/min of H<sub>2</sub> and 18 ml/min of Ar for 2 h. After reduction, H<sub>2</sub> was turned off, and the catalyst was purged with Ar for 30 min, and then introduce 3.6 ml/min of C<sub>3</sub>H<sub>8</sub> to start the reaction. The gas from the reactor outlet was introduced into Agilent gas chromatography for in-line detection, and the gas after the reaction was quantified by the standard curve method. The propane conversion and propylene selectivity were calculated by Equations (1) and (2), respectively:

$$C = \left( 1 - \frac{3 \times F_{C_3H_8}}{\sum_i i \times F_{Ci\%}} \right) \times 100\% \quad (1)$$

$$S_i = \frac{i \times F_{Ci}}{\sum_i i \times F_{Ci\%}} \times 100\% \quad (2)$$

Where F means the mole fraction of each component in the outlet gas of the fixed bed, and i means the number of C atoms contained in each component.

### **Regeneration stability**

After 12 h of reaction, the feed was switched to Ar gas purge catalyst and reduced to room temperature. The spent catalyst was heated to 500 °C at a rate of 5 °C/min in an air-atmosphere muffle furnace for 2 h, after which the performance was retested under the same conditions.

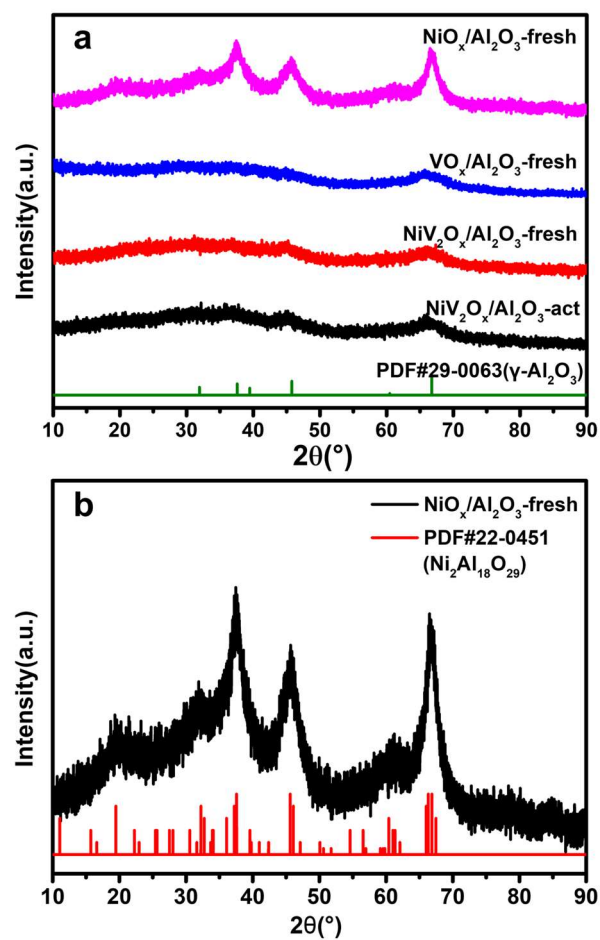

**Fig.S1** XRD patterns of different catalysts

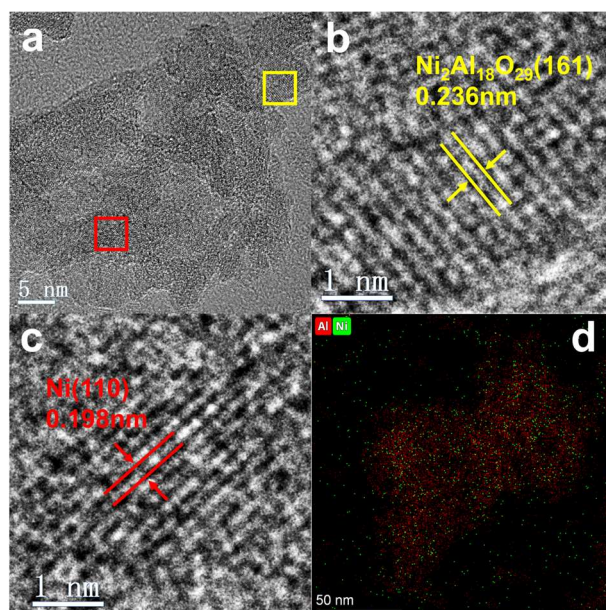

**Fig.S2** (a) TEM image of NiO<sub>x</sub>/Al<sub>2</sub>O<sub>3</sub>-fresh; The lattice information within the corresponding color box in a: (b) Ni<sub>2</sub>Al<sub>18</sub>O<sub>29</sub>, (c) Ni; (d) EDS mapping of the NiO<sub>x</sub>/Al<sub>2</sub>O<sub>3</sub>-fresh with the signals attributed to the different elements shown as Ni and Al.

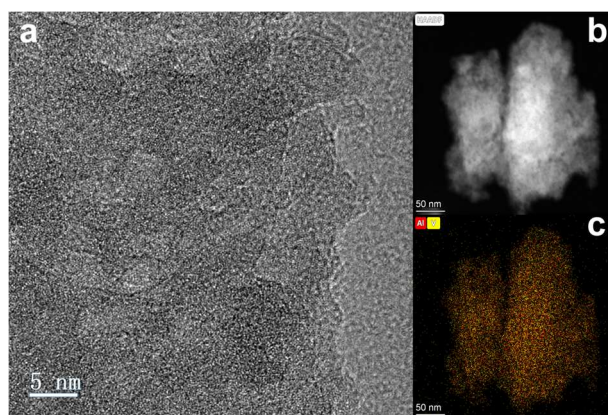

**Fig.S3** (a) TEM image of VO<sub>x</sub>/Al<sub>2</sub>O<sub>3</sub>-fresh; (b) The HAADF-STEM imaging of VO<sub>x</sub>/Al<sub>2</sub>O<sub>3</sub>-fresh; (c) EDS mapping of the VO<sub>x</sub>/Al<sub>2</sub>O<sub>3</sub>-fresh shown in b, with the signals attributed to the different elements shown as V and Al.

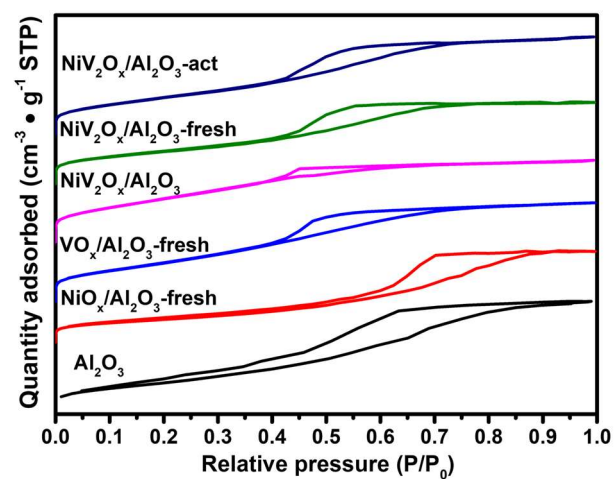

**Fig.S4** N<sub>2</sub> adsorption-desorption isotherms of different catalysts



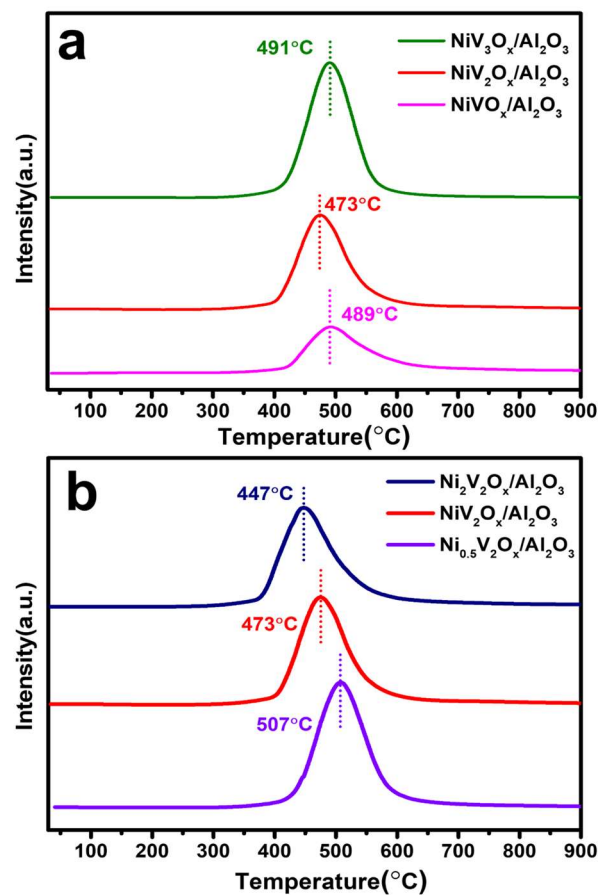

**Fig.S5** H<sub>2</sub>-TPR spectra of different catalysts: (a) Fixed V loading, changing Ni/V ratio; (b) Fixed Ni loading, changing Ni/V ratio.

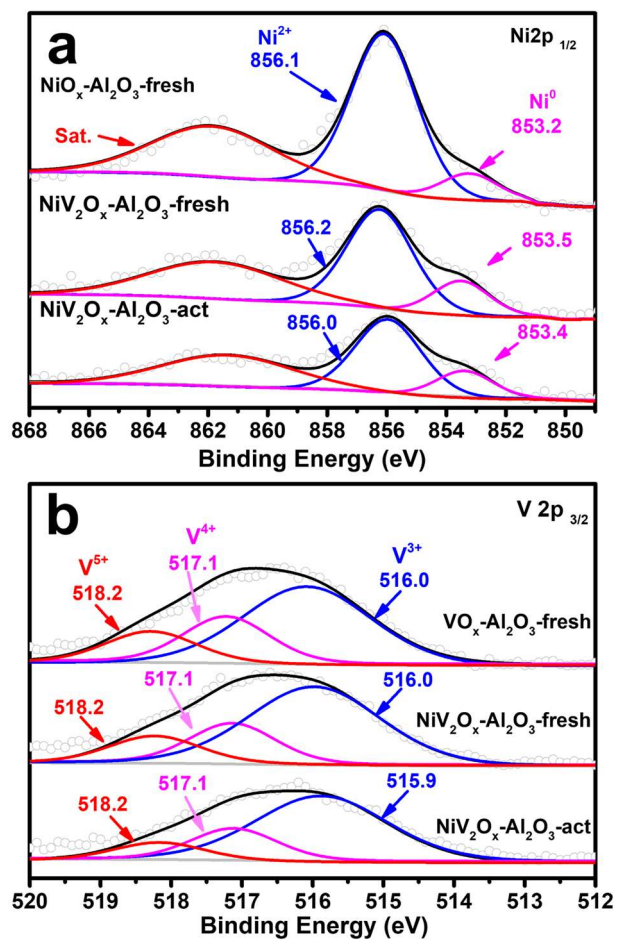

**Fig.S6** XPS spectra of (a)  $\text{Ni}2p$  and (b)  $\text{V}2p$  with different catalysts.

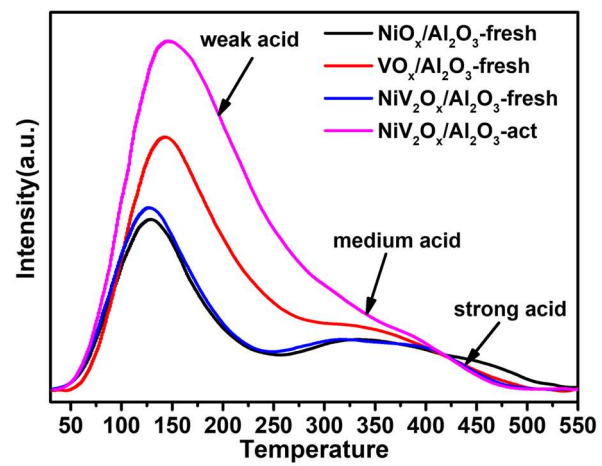

**Fig.S7** NH<sub>3</sub>-TPD profiles of different catalysts

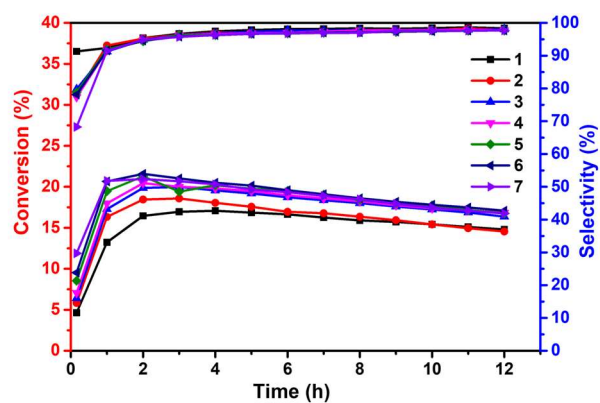

**Fig.S8** Regeneration test of  $\text{NiV}_2\text{O}_x/\text{Al}_2\text{O}_3$ . Reaction conditions: 0.5 g catalyst, 3.6ml/min of  $\text{C}_3\text{H}_8$ , 18ml/min of Ar, 500 °C. Regeneration condition: air atmosphere, calcination at 500 °C for 2 h.

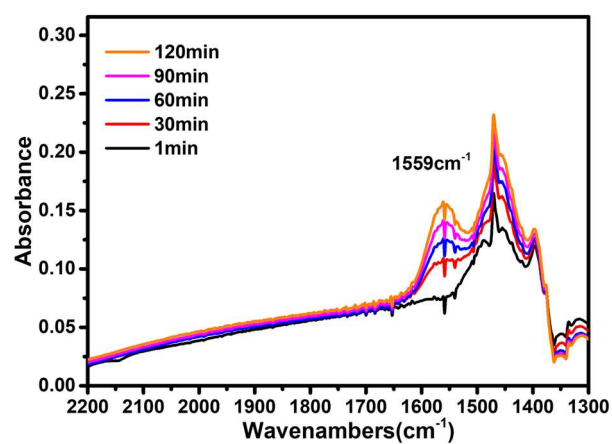

**Fig.S9** In-situ FTIR spectra during induction period.

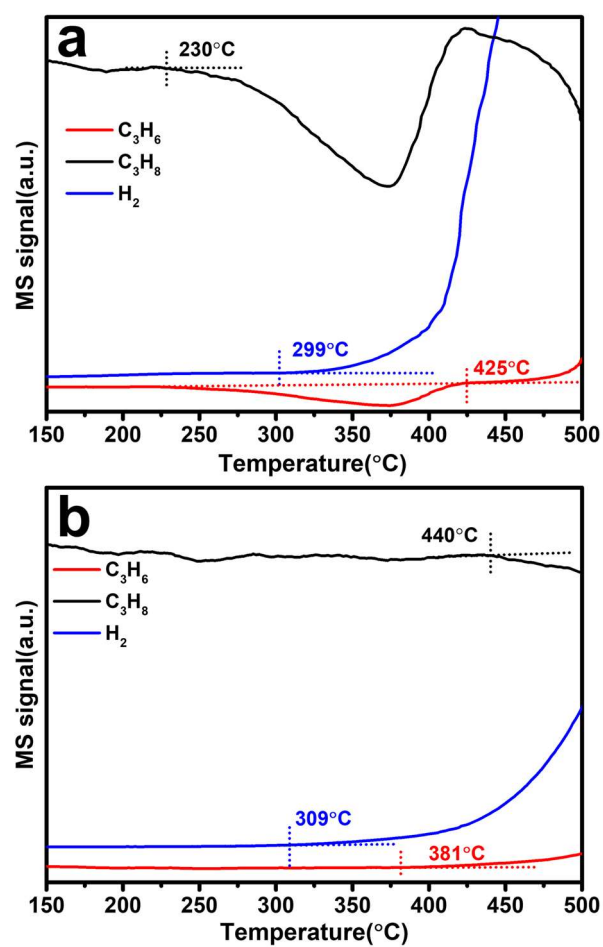

**Fig.S10**  $C_3H_8$ -TPSR on (a)  $NiO_x/Al_2O_3$ -fresh and (b)  $VO_x/Al_2O_3$ -act.

**Table.S1** Theoretical and actual metal loading of each catalyst and their TOF at 2 h of reaction.

| Sample                                                                          | theoretical loading <sup>a</sup> |         | actual loading <sup>b</sup> |         | TOF <sup>c</sup><br>(mmol <sub>C<sub>3</sub>H<sub>6</sub></sub> *<br>mol <sub>M</sub> <sup>-1</sup> * s <sup>-1</sup> ) |
|---------------------------------------------------------------------------------|----------------------------------|---------|-----------------------------|---------|-------------------------------------------------------------------------------------------------------------------------|
|                                                                                 | Ni (wt%)                         | V (wt%) | Ni (wt%)                    | V (wt%) |                                                                                                                         |
| NiO <sub>x</sub> /Al <sub>2</sub> O <sub>3</sub>                                | 5.00                             | -       | 3.97                        | -       | 0.694                                                                                                                   |
| VO <sub>x</sub> /Al <sub>2</sub> O <sub>3</sub>                                 | -                                | 8.67    | -                           | 3.65    | 0.270                                                                                                                   |
| NiVO <sub>x</sub> /Al <sub>2</sub> O <sub>3</sub>                               | 5.00                             | 4.34    | 3.52                        | 1.88    | 0.836                                                                                                                   |
| NiV <sub>2</sub> O <sub>x</sub> /Al <sub>2</sub> O <sub>3</sub>                 | 5.00                             | 8.67    | 3.37                        | 3.55    | 0.662                                                                                                                   |
| NiV <sub>3</sub> O <sub>x</sub> /Al <sub>2</sub> O <sub>3</sub>                 | 5.00                             | 13.01   | 2.99                        | 4.87    | 0.618                                                                                                                   |
| Ni <sub>0.5</sub> V <sub>2</sub> O <sub>x</sub> /Al <sub>2</sub> O <sub>3</sub> | 2.50                             | 8.67    | 1.97                        | 4.26    | 0.591                                                                                                                   |
| Ni <sub>2</sub> V <sub>2</sub> O <sub>x</sub> /Al <sub>2</sub> O <sub>3</sub>   | 10.00                            | 8.67    | 6.96                        | 3.73    | 0.360                                                                                                                   |

a Ideal metal loading based on carrier quality.

b Metal loading measured by ICP based on catalyst quality.

c M represented the total molar of active metals obtained based on ICP results.

**Table.S2** The texture property of each catalyst and the proportion of different valence states of V in each catalyst

| Sample                                                                 | $S_{BET}$<br>(m <sup>2</sup> /g) | $V_t$<br>(cm <sup>3</sup> /g) | $D_{BJH}$<br>(nm) | VO <sub>x</sub> species proportion |                     |                     |
|------------------------------------------------------------------------|----------------------------------|-------------------------------|-------------------|------------------------------------|---------------------|---------------------|
|                                                                        |                                  |                               |                   | V <sup>3+</sup> (%)                | V <sup>4+</sup> (%) | V <sup>5+</sup> (%) |
| Al <sub>2</sub> O <sub>3</sub>                                         | 356.8                            | 0.48                          | 4.41              | -                                  | -                   | -                   |
| NiO <sub>x</sub> /Al <sub>2</sub> O <sub>3</sub> -fresh                | 247.2                            | 0.41                          | 4.19              | -                                  | -                   | -                   |
| VO <sub>x</sub> /Al <sub>2</sub> O <sub>3</sub> -fresh                 | 455.8                            | 0.35                          | 3.71              | 60.61                              | 23.03               | 16.36               |
| NiV <sub>2</sub> O <sub>x</sub> /Al <sub>2</sub> O <sub>3</sub>        | 514.1                            | 0.42                          | 3.52              | -                                  | -                   | -                   |
| NiV <sub>2</sub> O <sub>x</sub> /Al <sub>2</sub> O <sub>3</sub> -fresh | 349.4                            | 0.31                          | 3.73              | 64.10                              | 21.15               | 14.74               |
| NiV <sub>2</sub> O <sub>x</sub> /Al <sub>2</sub> O <sub>3</sub> -act   | 413.5                            | 0.39                          | 4.44              | 66.67                              | 20.67               | 12.67               |
